# Supplementary material for: DNA hypermethylation during tuberculosis dampens host immune responsiveness
Source: JCI journal article supplement (doi:10.1172/jci134622), 2020-03-10
Supplement: sd1 [file 1]

### A Mtb immune response

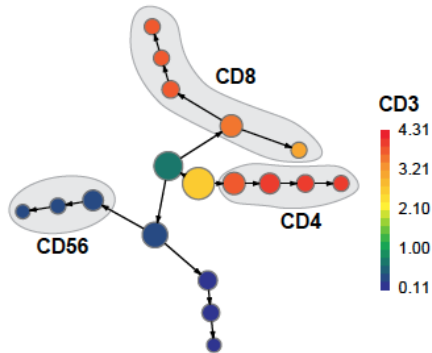

IFN $\gamma$

Ki67

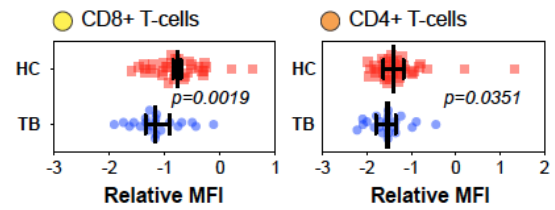

### B SEB immune response

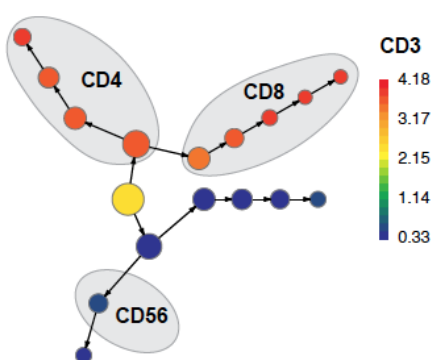

IFN $\gamma$

Ki67

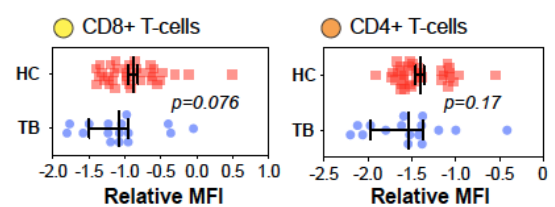

### C

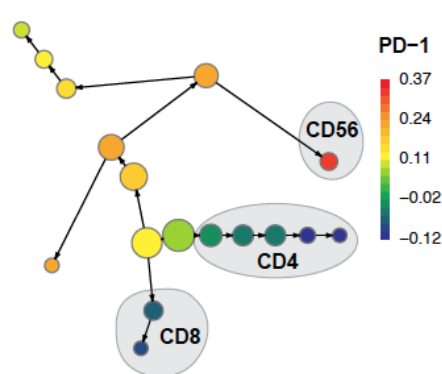

**Supplemental Figure 1: TB patients exhibit an exhausted immune phenotype.** PBMCs from individuals with Tuberculosis (TB;  $n = 29$ ) and their asymptomatic household contacts (HC;  $n = 49$ ) had their PBMCs divided into PBS vehicle non-stimulated control ("Nil stim"), BCG stimulated, ESAT-6 and CFP-10 stimulated and Staphylococcal-enterotoxin B (SEB) stimulated cells ( $0.5 - 1 \times 10^6$  cells per condition). Cells were stimulated overnight with monensin and BFA for the final 12 hours. The BCG immune response is presented in Figure 1.

Citrus (cluster identification, characterization, and regression) identified CD4, CD8, CD3 and CD56 subsets.

(S1A) Mtb-specific (ESAT-6 and CFP-10) immune response: CITRUS was clustered based upon CD3, CD4, CD8 and CD56 surface markers with minimum of 10% population per node with CD3 signal depicted by color gradient. Grey shaded sub-clusters demonstrate nodes with decreased Mtb-specific (ESAT-6 and CFP-10) up-regulation of IFN- $\gamma$  and Ki67 with an FDR  $< 1\%$ . (S1B) Staphylococcal-

enterotoxin B (SEB) immune response: CITRUS analysis demonstrates CD4, CD8 and NK cells with decreased Ki-67 and IFN- $\gamma$ . **(S1C)** PD-1 NK cells: CITRUS analysis identifies TB patients to have increased abundance of PD-1 expressing NK cells compared to healthy controls

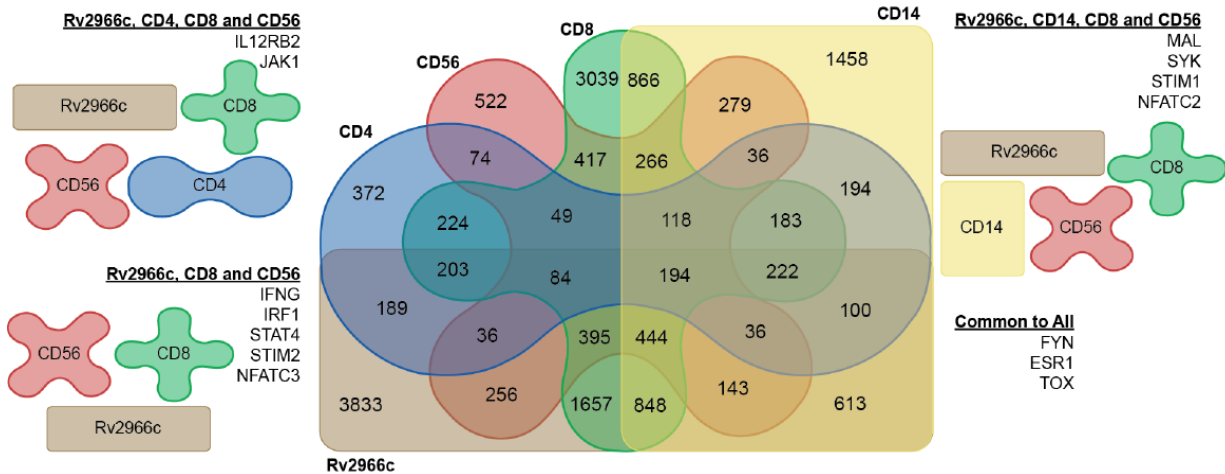

**Supplemental Figure 2:** Venn Diagram demonstrates overlap of in vivo DNA hyper-methylation in TB patients from Eswatini with previously published in vitro DNA hyper-methylation by Rv2966c as described by Sharma et al(24, 25). Venn diagram of genes with DNA hyper-methylation in CD4, CD8, CD56 and CD14 cells from this cohort of TB patients.

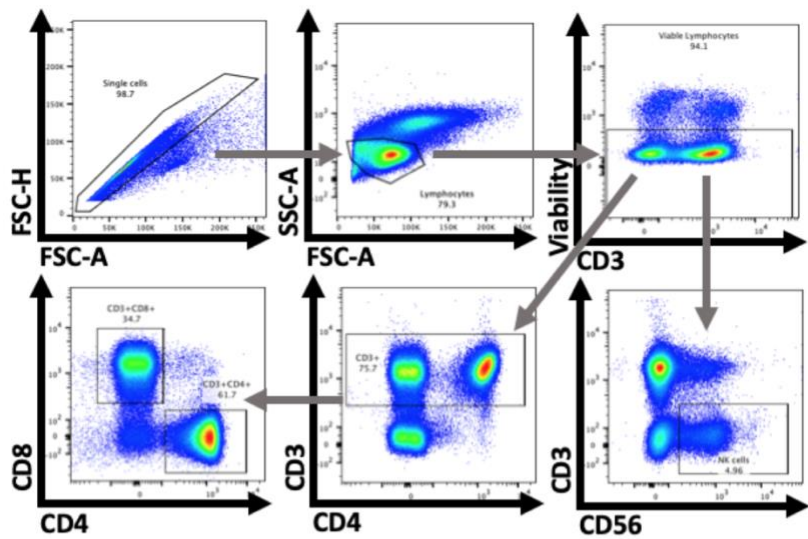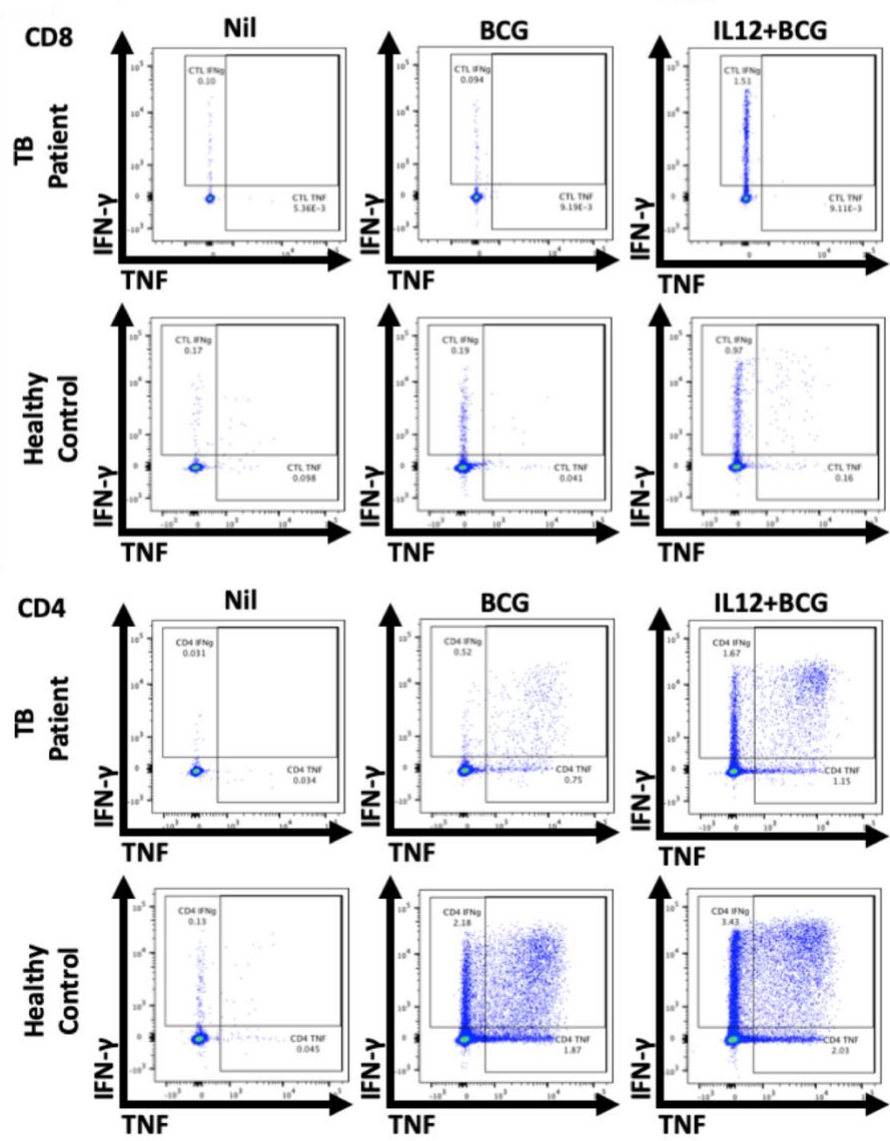

**Supplemental Figure 3:** Representative gating strategy and dot plots for data demonstrated in Figure 7 with no stimulation ("Nil"), BCG or IL-12 plus BCG stimulation.

**Supplemental Table 3:** Antibodies used for flow cytometry.

| Target        | Flor                         | Company       | Catalog    | Clone     |
|---------------|------------------------------|---------------|------------|-----------|
| CD8           | BV786                        | BD Horizon    | 563823     | RPA-T8    |
| CD4           | PE-Cyanine5.5                | eBioscience   | 35-0047-42 | SK3       |
| CD279 (PD-1)  | APC/Cy7                      | BioLegend     | 329922     | EH12.2H7  |
| CD56          | BV605                        | BD Bioscience | 562780     | NCAM16.2  |
| IFN- $\gamma$ | Alexa Fluor <sup>®</sup> 700 | BioLegend     | 506516     | B27       |
| T-bet         | FITC                         | BioLegend     | 644812     | 4B10      |
| CD3           | BV711                        | BD Bioscience | 563725     | UCHT1     |
| IL-4          | BV421                        | BD Bioscience | 562986     | 8D4-8     |
| IL-13         | APC                          | BioLegend     | 501907     | JES10-5A2 |
| IL-10         | PE-CF594                     | BD Bioscience | 562400     | JES3-19F1 |
| Perforin      | PE                           | BioLegend     | 353304     | B-D48     |
| TNF- $\alpha$ | BV650 <sup>™</sup>           | BioLegend     | 502938     | Mab11     |
| Ki-67         | BUV395                       | BD Bioscience | 564071     | B56       |
| GATA3         | PE-Cy <sup>™</sup> 7         | BD Bioscience | 560405     | L50-823   |
